# Supplementary material
Source: Springer Nature journal article supplement (https://www.springermedizin.de/resource/supplementary/12967_2009_426_MOESM11_ESM.pdf/9576592)
Supplement: MOESM11 [file 9576592]

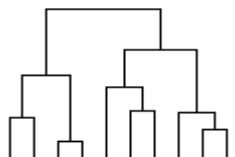

D5 Sti 24h  
 D4 Sti 24h  
 D3 Sti 24h  
 D1 Sti 24h  
 D2 Sti 24h  
 D4 NonSti 24h  
 D2 NonSti 24h  
 D3 NonSti 24h  
 D5 NonSti 24h  
 D1 NonSti 24h

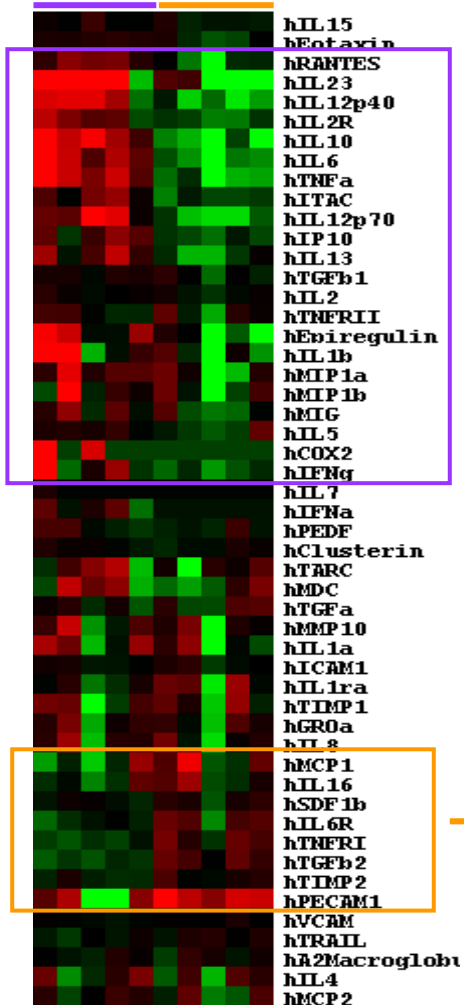

| Protein       | Fold Change (sti/Nsti) |
|---------------|------------------------|
| RANTES (CCL5) | 4.86                   |
| IL23          | 23.52                  |
| IL12p40       | 21.21                  |
| IL2R          | 6.44                   |
| IL10          | 46.84                  |
| IL6           | 27.47                  |
| TNFa          | 26.24                  |
| ITAC (CXCL11) | 4.5                    |
| IL12p70       | 33.38                  |
| IP10 (CXCL10) | 4.1                    |
| IL13          | 6.03                   |
| TGFb1         | 1.32                   |
| IL2           | 1.2                    |
| TNFR1I        | 1.02                   |
| Epregrulin    | 8.66                   |
| IL1b          | 10.37                  |
| MIP1a( CCL3)  | 3.02                   |
| MIP1b (CCL4)  | 3.2                    |
| MIG (CXCL9)   | 2.19                   |
| IL5           | 1.34                   |
| COX2          | 10.64                  |
| IFNg          | 24.15                  |

| Protein        | Fold Change (sti/Nsti) |
|----------------|------------------------|
| MCP1 (CCL2)    | -2.70                  |
| IL16           | -1.85                  |
| SDF1b (CXCL12) | -1.33                  |
| IL6R           | -2.70                  |
| TNFR1          | -3.33                  |
| TGFb2          | -3.70                  |
| TIMP2          | -1.64                  |
| PECAM1 (CD31)  | -3.23                  |
